# Supplementary material
Source: publisher site journal article supplement (https://www.spandidos-publications.com/8107/downloadSupplementary)
Supplement: Supplementary file 1 [file downloadSupplementary]

Table SI. Primers and siRNAs

| Primers and siRNAs | Sequence                                                                               |
|--------------------|----------------------------------------------------------------------------------------|
| GAPDH              | F: CTCTCTGCTCCTCCTGTTCG<br>R: TGACTCCGACCTTCACCTTC                                     |
| circ72309          | F: TAAAGTGG AACGACAGGGGT<br>R: CATCTGTGCAATGCAGTCAGTC                                  |
| SLC29A1            | F: GTGCCTTCGGCTACTTTATCAC<br>R: GCTAATGAGGTCCA ACTTGGTCT                               |
| CDA                | F: AAGTCAGCCTACTGCCCTAC<br>R: GATAGCGGTCCGTT CAGCAC                                    |
| miR-1225-3p        | TGAGCCCCTGTGCCGCCCCCAG                                                                 |
| miR-1234           | TCGGCCTGACCACCCACCCAC                                                                  |
| si_circ72309       | Sense: 5'-CTCGTAAAATTAGACTGACTG dTdT-3'<br>Antisense: 5'-CAGTCAGTCTAATTTTACGAG dTdT-3' |

---

circRNA, circular RNA; miR, microRNA; si, small interfering.

Table SII. Sequencing coverage and quality statistics for each sample

| Sample ID | Status          | Total number of sequenced reads | Total number of uniquely mapped reads<br>(mapping rate based on hg19) | RIN | rRNA rate | Total number of detected transcripts with reads $\geq 1$ |
|-----------|-----------------|---------------------------------|-----------------------------------------------------------------------|-----|-----------|----------------------------------------------------------|
| GA69617   | GR3_circ72309OE | 30,050,782                      | 94.9%                                                                 | >7  | NA        | 9,959/26,255                                             |
| GA69618   | GR3_circ72309OE | 26,439,586                      | 95.1%                                                                 | >7  | NA        | 10,314/26,255                                            |
| GA69619   | GR3_circ72309OE | 40,165,973                      | 95.0%                                                                 | >7  | NA        | 9,716/26,255                                             |
| GA69620   | GR3_NC          | 28,185,480                      | 91.4%                                                                 | >7  | NA        | 9,951/26,255                                             |
| GA69621   | GR3_NC          | 24,407,074                      | 91.8%                                                                 | >7  | NA        | 10,112/26,255                                            |
| GA69622   | GR3_NC          | 24,572,356                      | 91.5%                                                                 | >7  | NA        | 10,052/26,255                                            |

Table SIII. Target miRNAs of circ72309 predicted by CircInteractome

---

Target miRNAs of circ72309 predicted by CircInteractome

---

|                       |               |                |
|-----------------------|---------------|----------------|
| hsa-miR1206           | hsa-miR149    | hsa-miR518a-5p |
| <b>hsa-miR1225-3p</b> | hsa-miR326    | hsa-miR527     |
| <b>hsa-miR1234</b>    | hsa-miR330-5p | hsa-miR543     |
| hsa-miR1257           | hsa-miR331-5p | hsa-miR579     |
| hsa-miR127-5p         | hsa-miR375    | hsa-miR580     |
| hsa-miR1276           | hsa-miR409-3p | hsa-miR607     |
| hsa-miR1277           | hsa-miR492    | hsa-miR648     |
| hsa-miR1299           | hsa-miR515-5p | hsa-miR665     |
| hsa-miR1305           | hsa-miR516b   |                |

---

Bold entries represent miRNAs identified by TargetScan as having putative binding sites with *SLC29A1*.

---



Table SV. Primer–target overlap within the circ72309 back-splice junction sequence.

---

**Primer–target overlap within the circ72309 back-splice junction sequence**

---

5'-

**CCTAAAGTGGAAACGACAGGGGTCAGGTTTTCCACACCCGCTCAAATGTTTATCTGGGAAATTAAGTTCTACGTAAAGAGAGTATGG**  
**AGCTCGTAAAATTA|GACTGACTGCATTGCACAGATGATGAGATATTTACGTATGTTGAAACGACCATCCTGGATGTGGACAATAAAA**  
**AAGATGAGGACTGCTCAAATTCCAG -3'**

---

The full circ72309 back-splice junction sequence (5'→3') is shown, with the forward primer sequence highlighted in red and the reverse-primer binding region highlighted in blue. The vertical bar (|) indicates the precise back-splice junction.

---
